# Supplementary material
Source: PubMed Central journal article supplement (PMC2862987)
Supplement: NIHMS195271-supplement-supplimentary.pdf [file NIHMS195271-supplement-supplimentary.pdf]

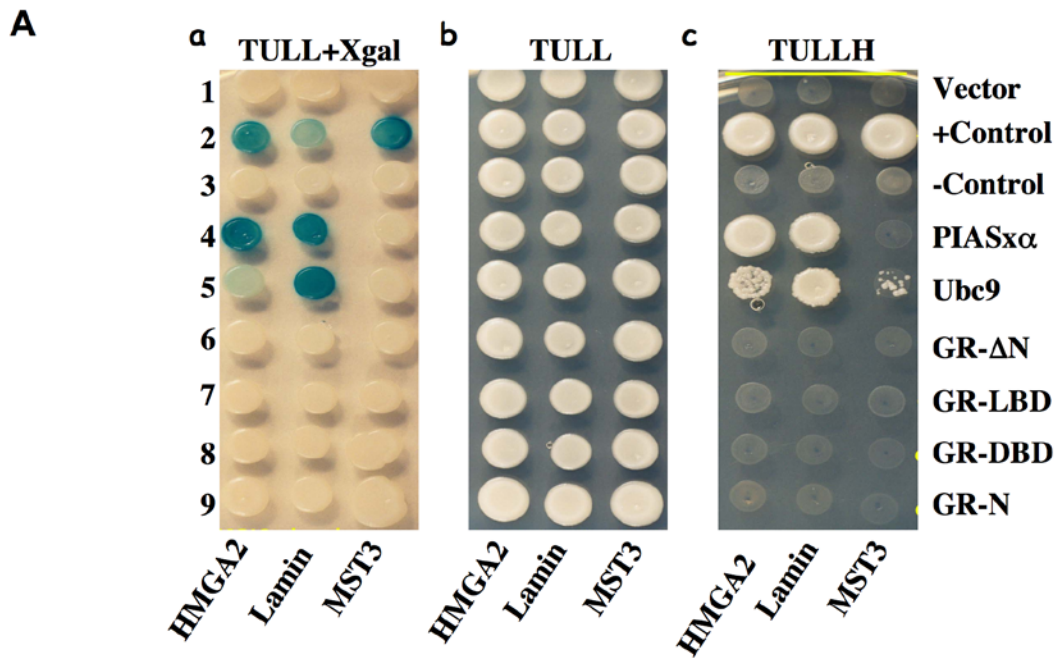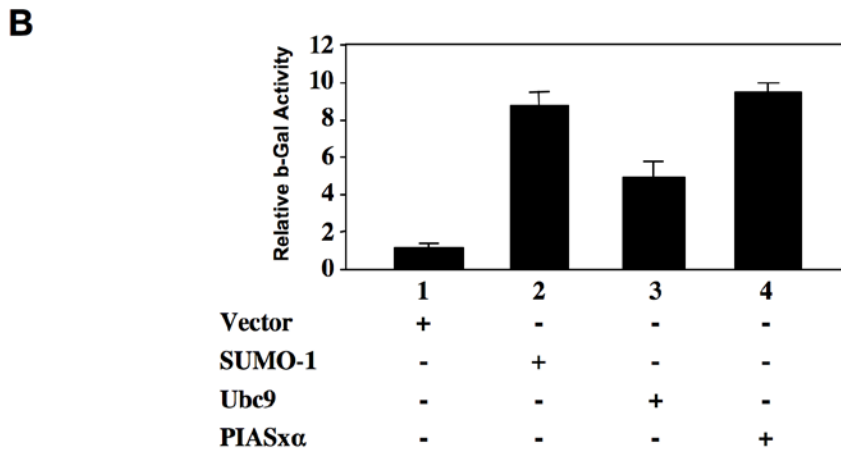

**Fig. S1. HMGA2 interacts with SUMO1 and its E2 and E3 in yeast cells.** (A) Yeast Two-Hybrid analyses shown HMGA2 interacts with members of SUMOylation machinery. HMGA2, lamin and MST3, respectively, were fused to LexA DNA binding domain as bait and various cDNAs, as indicated, were fused to the Gal4 activation domain (Gal4AD) as prey. Yeast strain L-40 cells, co-transformed with indicated bait and prey, were spotted on medium plates of TULL+Xgal, TULL and TULLH, respectively. (B) Quantification of interaction between HMGA2 and SUMOylation machinery by  $\beta$ -galactosidase liquid assay. Yeasts with positive interactions of bait and prey identified in (A) were further subjected to  $\beta$ -galactosidase liquid assay. The  $\beta$ -galactosidase activity was determined according to the instructions of the Galacto-light plus kit (Tropix Inc.).
